# Supplementary material for: Recruitment of PfSET2 by RNA Polymerase II to Variant Antigen Encoding Loci Contributes to Antigenic Variation in P. falciparum
Source: PubMed Central journal article supplement (PMC3879369; doi:10.1371/journal.ppat.1003854), 2014-01-02
Supplement: ppat.1003854.s002.pdf [file ppat.1003854.s002.pdf]

R2 Y<sup>\*</sup>S<sup>\*</sup>PTSPT YNANNAY Y<sup>\*</sup>S<sup>\*</sup>PTSPKNQNDQMNVNSQYNVMSPV Y<sup>\*</sup>S<sup>\*</sup>VTSPK

Y<sup>\*</sup>S<sup>\*</sup>PTSPK Y<sup>\*</sup>S<sup>\*</sup>PTSPK Y<sup>\*</sup>S<sup>\*</sup>PTSPK Y<sup>\*</sup>S<sup>\*</sup>PTSPK Y<sup>\*</sup>S<sup>\*</sup>PTSPK Y<sup>\*</sup>S<sup>\*</sup>PTSPK Y<sup>\*</sup>S<sup>\*</sup>PTSPK Y<sup>\*</sup>S<sup>\*</sup>PTSPK

Y<sup>\*</sup>S<sup>\*</sup>PTSPK Y<sup>\*</sup>S<sup>\*</sup>PTSPV AQNIASPNYSP Y<sup>\*</sup>S<sup>\*</sup>ITSPK FSPTSPA Y<sup>\*</sup>S<sup>\*</sup>ISSPV

R3 YDKSGVVNAHQPMSPAYILQSPVQIKQNVQDANMFSPIQQAHVDEAK  
 NDDPFSPMPYNIDEDEMKENM      209 a.a.

**Figure S2.** The amino acid sequence of the R2 and R3 regions of the C-terminal domain of Rpb1 from *P. falciparum* 3D7. The heptad repeats typical of Rpb1 are underlined, and the serine residues that are sites for phosphorylation are marked with asterisks.
