# Supplementary material for: Recruitment of PfSET2 by RNA Polymerase II to Variant Antigen Encoding Loci Contributes to Antigenic Variation in P. falciparum
Source: PubMed Central journal article supplement (PMC3879369; doi:10.1371/journal.ppat.1003854), 2014-01-02
Supplement: ppat.1003854.s005.pdf [file ppat.1003854.s005.pdf]

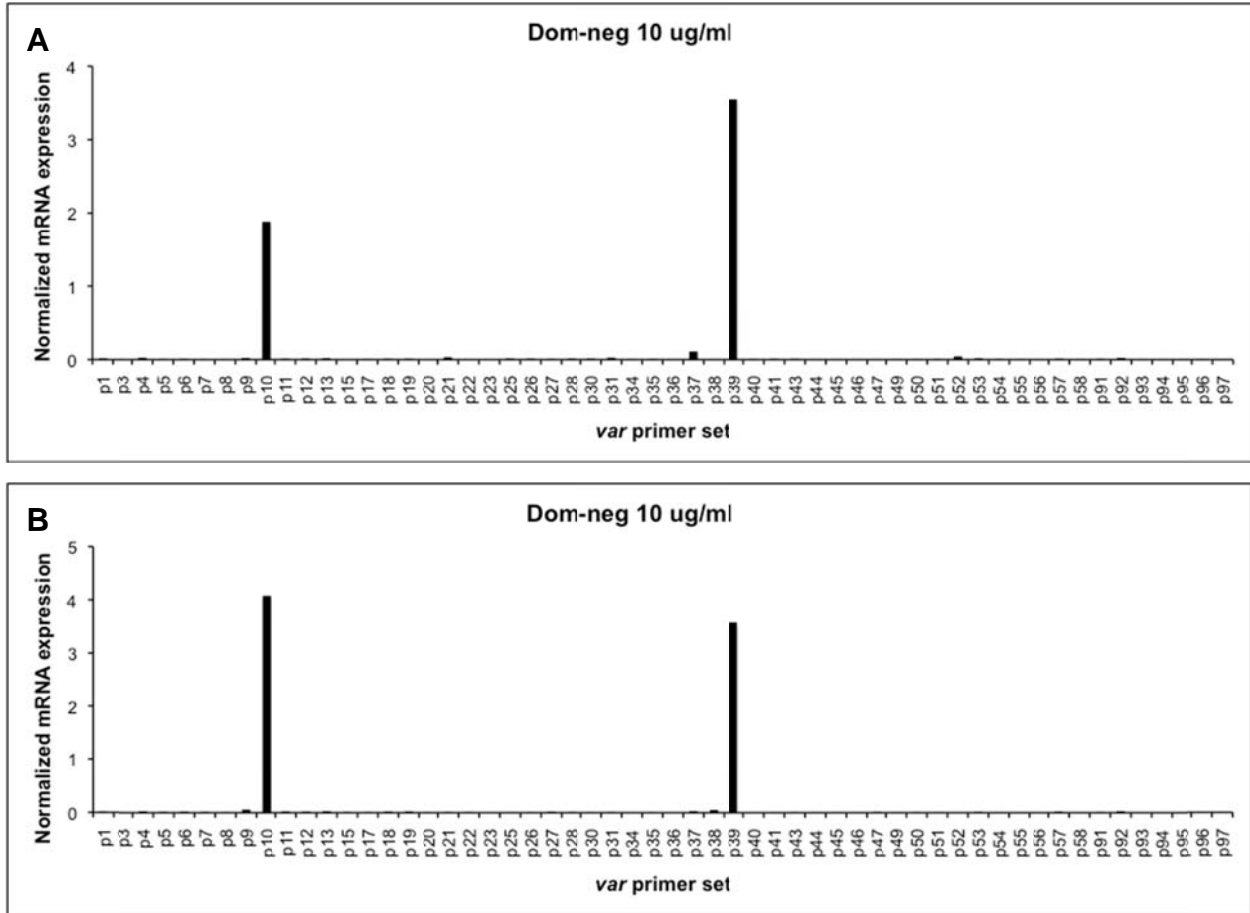

**Figure S5.** Transcriptional profile of the *var* gene family after two (A and B) independent increases from 2  $\mu\text{g/ml}$  to 10  $\mu\text{g/ml}$  blasticidin in A3 cultures overexpressing the dominant-negative, PfSRIR. The results in both experiments are similar to those shown in Figure 4D (left 2 pie charts).
