# Supplementary material for: Recruitment of PfSET2 by RNA Polymerase II to Variant Antigen Encoding Loci Contributes to Antigenic Variation in P. falciparum
Source: PubMed Central journal article supplement (PMC3879369; doi:10.1371/journal.ppat.1003854), 2014-01-02
Supplement: ppat.1003854.s006.pdf [file ppat.1003854.s006.pdf]

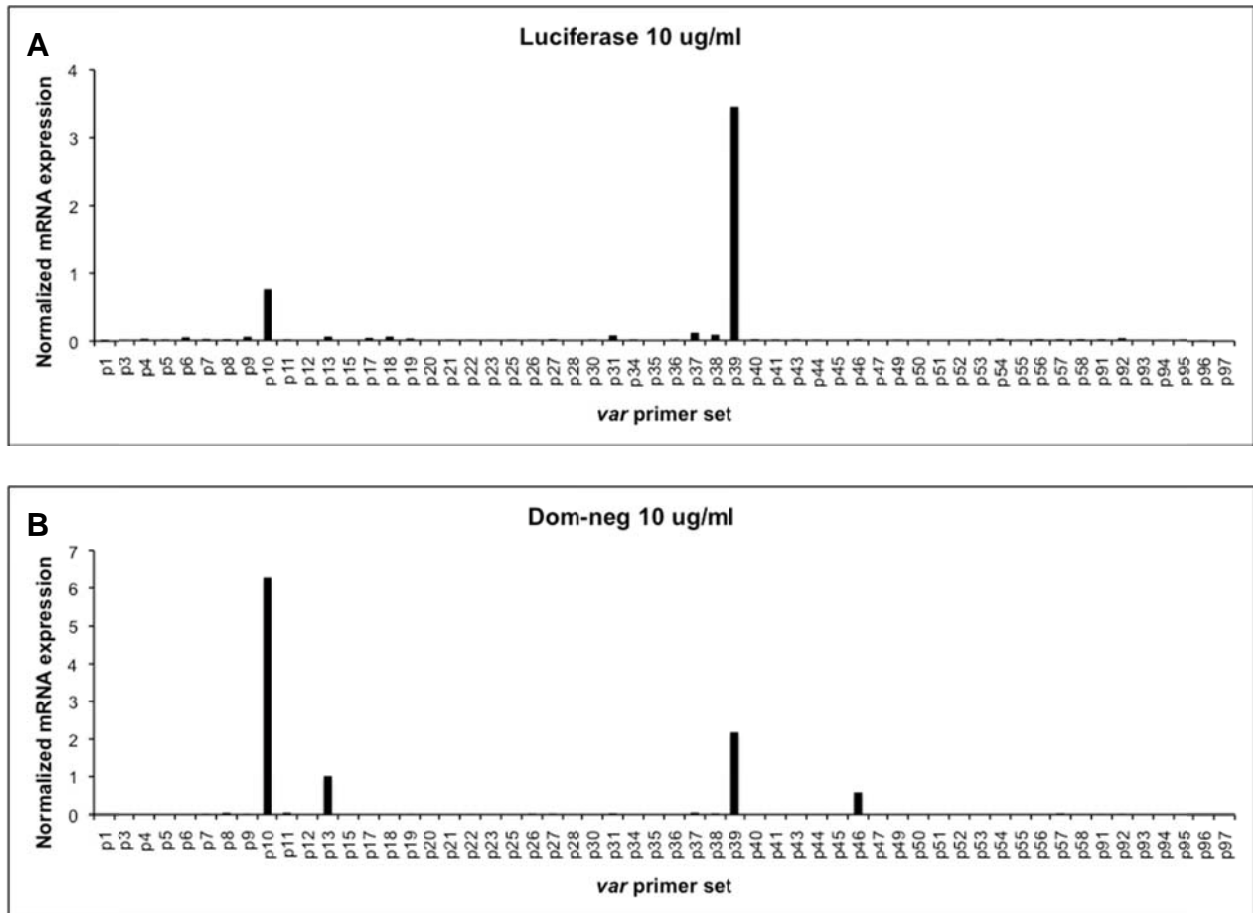

**Figure S6.** An independent transfection of C3 cultures with the constructs expressing Luciferase (A) and the dominant-negative, PfSRIR (B) shows a similar change in *var* gene transcription profile at 10  $\mu$ g/ml blasticidin.
