# Supplementary material for: Recruitment of PfSET2 by RNA Polymerase II to Variant Antigen Encoding Loci Contributes to Antigenic Variation in P. falciparum
Source: PubMed Central journal article supplement (PMC3879369; doi:10.1371/journal.ppat.1003854), 2014-01-02
Supplement: ppat.1003854.s007.pdf [file ppat.1003854.s007.pdf]

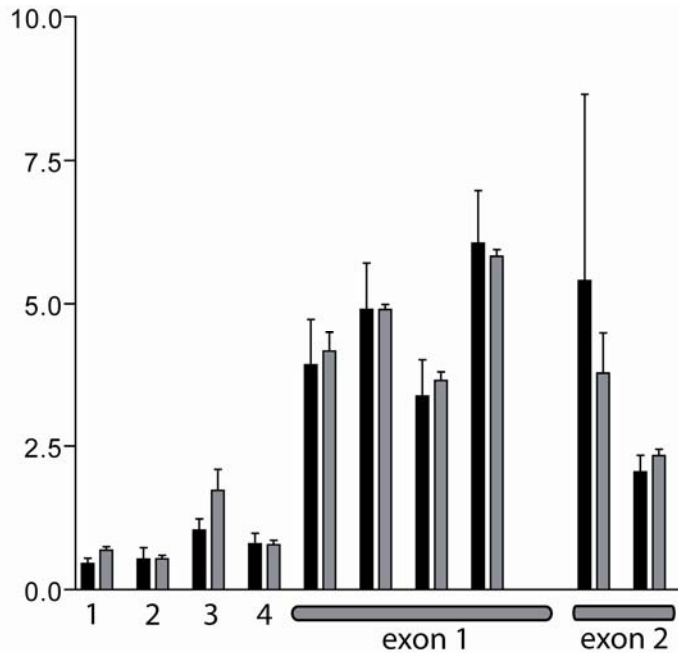

**Figure S7.** Chromatin immunoprecipitation data from Figure 3D shown as % input without normalization. Lanes 1 and 2 represent control genes encoding seryl t-RNA synthetase and actin, respectively. Lane 3 represents the gene for circumsporozoite protein. Lane 4 represent CTRP, the gene used for normalization in Figure 3D. The remaining lanes represent regions within the coding portion of both exons of the *var* gene PF3D7\_0421100. Black bars show results from chromatin extracted from the C3 line of NF54, in which PF3D7\_0421100 is the actively expressed *var* gene. The gray bars show chromatin extracted from the A3 line of NF54 in which this *var* gene is transcriptionally silent. The bars display the mean  $\pm$  standard deviation of relative amounts of bound DNA (see methods) from four independent experiments.
