# Supplementary material for: Recruitment of PfSET2 by RNA Polymerase II to Variant Antigen Encoding Loci Contributes to Antigenic Variation in P. falciparum
Source: PLOS journal article supplement (doi:10.1371/journal.ppat.1003854), 2014-01-02
Supplement: S3 (10.1371/journal.ppat.1003854.s003) [file journal.ppat.1003854.s003]

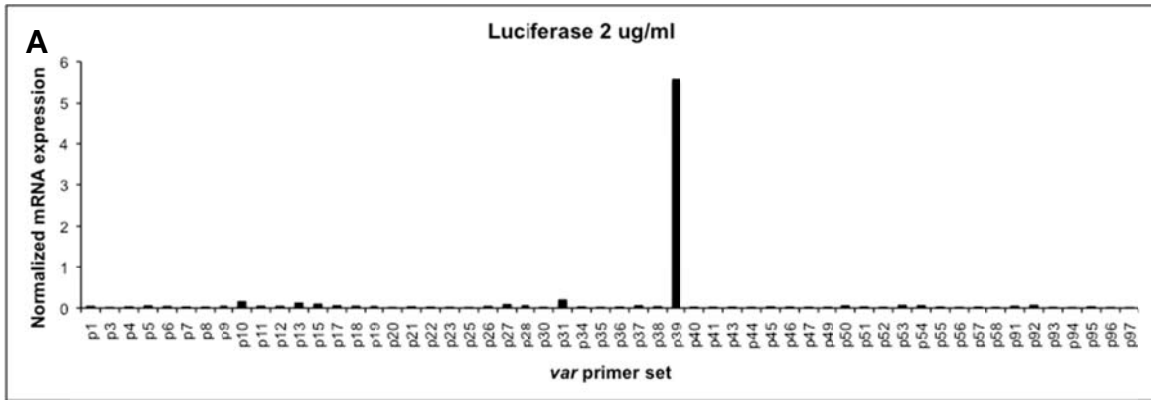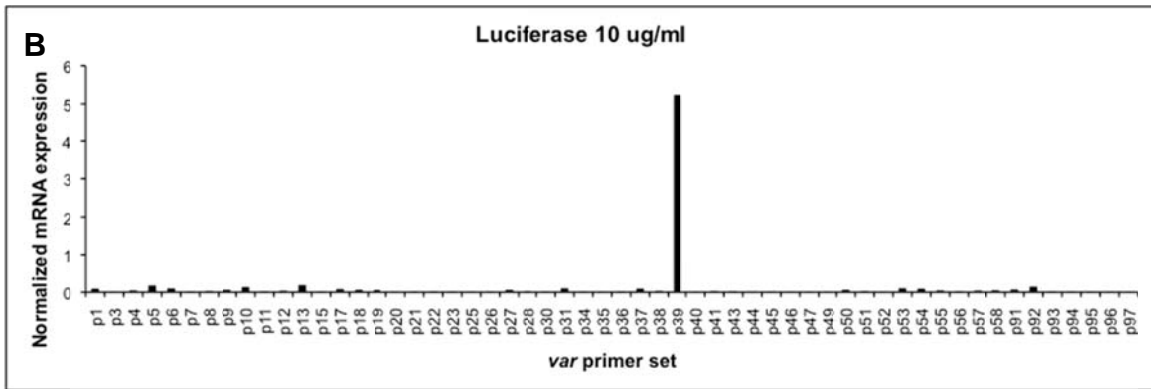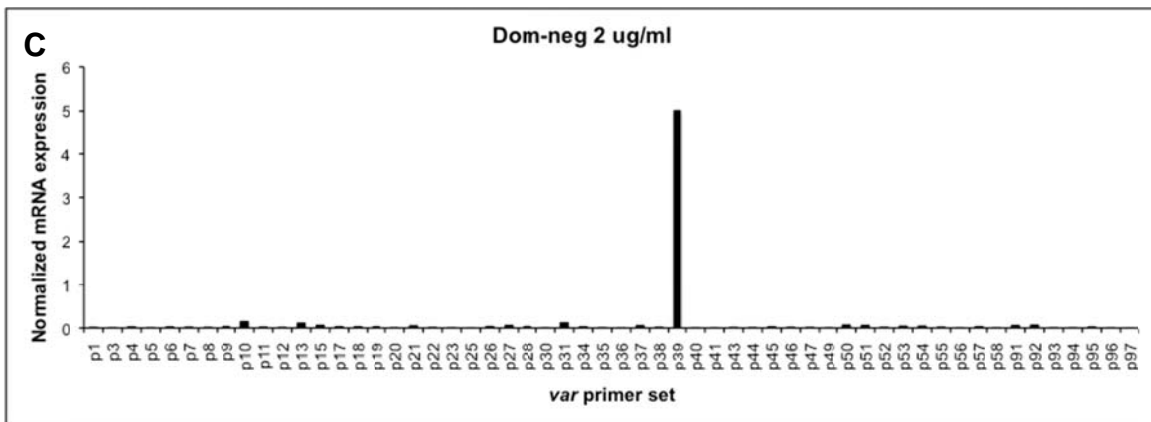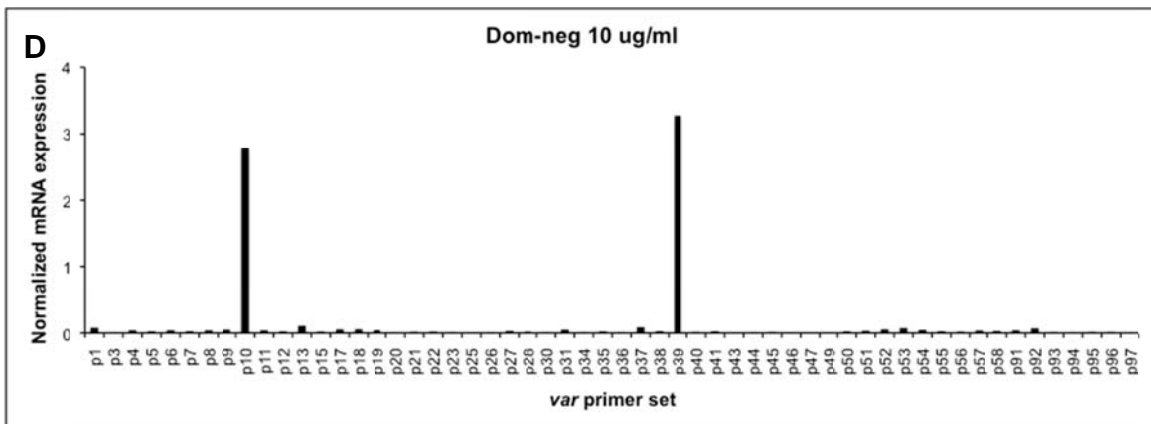

**Figure S3.** *var* gene family transcription profile from A3 cultures (Figure 4) shown as bar graphs. We used the *var* primer set to detect transcription as designed by Salanti *et al.* *var* gene expression patterns when overexpressing Firefly Luciferase at 2 µg/ml (A) and 10 µg/ml blasticidin (B). *var* gene expression profiles in the presence of the dominant-negative, PfSRI at 2 µg/ml (C) and 10 µg/ml blasticidin (D). The p10 primer pair detects PFL0030c, or *var2csa*, at higher concentrations of blasticidin.
